# Supplementary material for: Apatinib inhibits tumor growth and angiogenesis in PNET models
Source: PubMed Central journal article supplement — Endocr Connect. 2018 Dec 17;8(1):8–19. doi: 10.1530/EC-18-0397 (PMC6330719; doi:10.1530/ec-18-0397), 2018-12-17
Supplement: supplementary_table_1.pdf [file supplementary_table_1.pdf]

**Supplementary Table 1.** PCR primer sequences and product sizes.

| Amplified fragments | Primer sequences                                                    | Length (bp) |
|---------------------|---------------------------------------------------------------------|-------------|
| ham <i>Actb</i>     | F: 5'-TGCTATGTTGCCCTGGACTT-3'<br>R: 5'-TTTCGTGGATGCCACAGGAT-3'      | 181         |
| ham <i>Vegfa</i>    | F: 5'-TGCAGACCAAAGAAAGTCAGA-3'<br>R: 5'-TCTGCGGATCTTGGACAAACA-3'    | 91          |
| ham <i>Kdr</i>      | F: 5'-CAGTGGGATGGTCCCTTGCAT-3'<br>R: 5'-GTACCCAGACTGATAGCCGC-3'     | 326         |
| r <i>Gapdh</i>      | F: 5'-GACATCCGTAAAACCTCTATGCC-3'<br>R: 5'-AAGAGCCACCATCCACACAGAG-3' | 173         |
| r <i>Vegfa</i>      | F: 5'-ATCTTCAAGCCGTCCTGTGTG-3'<br>R: 5'-CAAGGCTCACAGTGATTTTC-3'     | 138         |
| r <i>Kdr</i>        | F: 5'-GCTACCCCGCACGAATGATA-3'<br>R: 5'-CTGCAGTGCATAACCTGGGA-3'      | 298         |

\*ham, hamster; m, mouse; r, rat.

\*F, forward primers; R, reverse primers.
