# Supplementary figures and images for: Apatinib inhibits tumor growth and angiogenesis in PNET models
Source: PubMed Central journal article supplement — Endocr Connect. 2018 Dec 17;8(1):8–19. doi: 10.1530/EC-18-0397 (PMC6330719; doi:10.1530/ec-18-0397), 2018-12-17

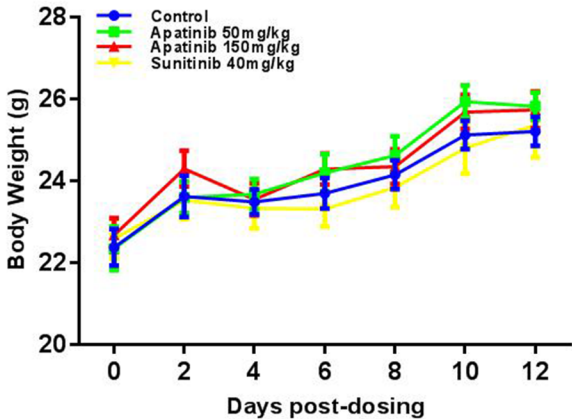

Supplement: supplementary_figure_1.pdf [file supplementary_figure_1.pdf]
